# Supplementary material for: Salivary Neurotrophins Brain-Derived Neurotrophic Factor and Nerve Growth Factor Associated with Childhood Obesity: A Multiplex Magnetic Luminescence Analysis
Source: MDPI journal article supplement (doi:10.3390/diagnostics12051130), 2022-05-03
Supplement: s1 [file s1]

**Table S1.** Anthropometric measurements of study subjects

| <b>Parameter</b>                | <b>All</b>    | <b>NW</b>    | <b>OW</b>    | <b>OB</b>    |
|---------------------------------|---------------|--------------|--------------|--------------|
| <b>Number of Participants</b>   | 76            | 40 (52.6%)   | 20 (26.3%)   | 16 (21.1%)   |
| <b>Sex</b>                      | <b>Male</b>   | 41           | 20 (48.8%)   | 14 (34.1%)   |
|                                 | <b>Female</b> | 35           | 20 (57.1%)   | 6 (17.1%)    |
| <b>Age (years)</b>              | 8.43 ± 0.16   | 8.38 ± 0.23  | 8.32 ± 0.29  | 8.70 ± 0.37  |
| <b>BMI (kg/m<sup>2</sup>)</b>   | 18.42 ± 0.40  | 16.01 ± 0.24 | 19.29 ± 0.22 | 23.36 ± 0.80 |
| <b>BMI z-score</b>              | 0.94 ± 0.15   | -0.04 ± 0.13 | 1.57 ± 0.07  | 2.58 ± 0.13  |
| <b>Waist circumference (cm)</b> | 65.39 ± 1.01  | 60.18 ± 0.74 | 66.65 ± 1.11 | 76.87 ± 2.26 |
| <b>WC z-score</b>               | 0.68 ± 0.08   | 0.15 ± 0.08  | 0.98 ± 0.36  | 1.60 ± 0.09  |
| <b>WHtR z-score</b>             | 0.42 ± 0.09   | -0.13 ± 0.10 | 0.73 ± 0.06  | 1.37 ± 0.11  |

Results are expressed as Mean ± SEM. The data was presented in our previously published article [7], and this table was reproduced with Journal's permission.

Abbreviation: BMI – body mass index; WC – waist circumference; WHtR – waist-to-height ratio; NW – normal weight; OW – overweight; OB – obese.
